# Supplementary material for: Endocytosis is essential for dynamic translocation of a syntaxin 1 orthologue during fission yeast meiosis
Source: PubMed Central journal article supplement — Mol Biol Cell. 2011 Oct 1;22(19):3658–70. doi: 10.1091/mbc.E11-03-0255 (PMC3183020; doi:10.1091/mbc.e11-03-0255), 2011-10-01
Supplement: supp_E11-03-0255_CombinedSupMats.pdf [file supp_E11-03-0255_CombinedSupMats.pdf]

## Supplemental Materials

### Supplemental Materials and Methods

#### *Plasmid construction*

pZK194 (pREP41-GFP-ypt5) was constructed as follows. The *ypt5*<sup>+</sup> ORF and terminator region (1 kb downstream from the ORF) were amplified by PCR using 5'-GTCAGGTCGAC(*SalI*)AATGGCATCAAATACAGCT-3' and 5'-CATCGGAGCTC(*SacI*)ATTGCGGAGAAGCCTCCTC-3' as forward and reverse primers, respectively. The underlined sequences indicate restriction enzyme sites. The PCR product was digested with *SalI* and *SacI*, and then inserted into *SalI*- and *SacI*-digested pTN54 (pREP41-GFP), yielding pZK194 (pREP41-GFP-ypt5).

#### *Immunofluorescence microscopy*

For cell fixation, we followed the method of Hagan and Hyams (1988) and used glutaraldehyde and paraformaldehyde. Gma12-HA was visualized by indirect immunofluorescence microscopy using rat anti-HA antibody 3F10 (Roche) and Alexa 594-conjugated goat anti-rat IgG (Molecular Probes, Eugene, OR). To visualize the nuclear chromatin region, cells were stained with DAPI at 1 µg/ml.

### ***DRM isolation and immunoblotting***

The DRM was isolated as described (Bagnat *et al.*, 2000). Cells were collected and washed with distilled water. The cell pellet was then suspended in 0.5 ml of TNE buffer [50 mM Tris/HCl (pH 7.4), 150 mM NaCl, 5 mM EDTA]. After the addition of PMSF, the cells were ruptured with glass beads. The lysate was cleared by centrifugation at 500 x g for 5 min. A 0.3-ml aliquot of TNE buffer was added to 0.25 ml of the lysate, which was then incubated with Triton X-100 (1 % final) for 30 min on ice. After extraction of Triton X-100, the lysate (0.4 ml) was adjusted to 40% Optiprep by the addition of 0.8 ml of Optiprep solution (Axis-Shield, Oslo, Norway), and overlaid with 1.92 ml of 30% Optiprep in TXNE (TNE with 0.1% Triton X-100) and 0.32 ml of TXNE. The samples were centrifuged at 55,000 rpm for 2 h at 4°C using an ultracentrifuge (CP70G, Hitachi, Tokyo, Japan), with a swing rotor (RPS65T, Hitachi) and 13 x 51 mm polycarbonate tubes (Hitachi), and six fractions of equal volume were collected from the top. The top fraction was subjected to a second incubation with Triton X-100, loaded onto a second Optiprep gradient, and centrifuged again. Fractions from the gradients were precipitated with 10% (w/v) TCA, dissolved in appropriate volumes of cracking buffer [8 M urea,

5% (w/v) SDS, 1 mM EDTA, 50 mM Tris/HCl (pH 6.8), 5% (v/v) 2-mercaptoethanol], and incubated at 65°C for 20 min. Samples were resolved by SDS-PAGE on 10% gels and then transferred onto polyvinylidene difluoride membranes (Millipore). The membranes were probed with a mouse anti-GFP antibody (Roche) at a 1:1000 dilution, and a rabbit polyclonal anti-Psy1 antibody (Maeda *et al.*, 2009) or a rabbit polyclonal anti-Spo14 antibody (Nakamura-Kubo *et al.*, 2003) at a 1:2000 or 1:500 dilution, respectively. Immunoreactive bands of GFP fusion proteins were visualized by staining with an ECL horseradish peroxidase-conjugated sheep anti-mouse IgG (GE Healthcare) at a 1:5000 dilution and ECL-plus detection reagent (GE Healthcare). Immunoreactive bands of Psy1 or Spo14 were visualized by staining with a horseradish peroxidase-conjugated goat anti-rabbit IgG (Bio-Rad) at a 1:5000 dilution and ECL detection reagent (GE Healthcare).

Supplementary Figure Legends

Supplemental Figure 1

Kashiwazaki et al. (2011)

**A** *spo15 $\Delta$*

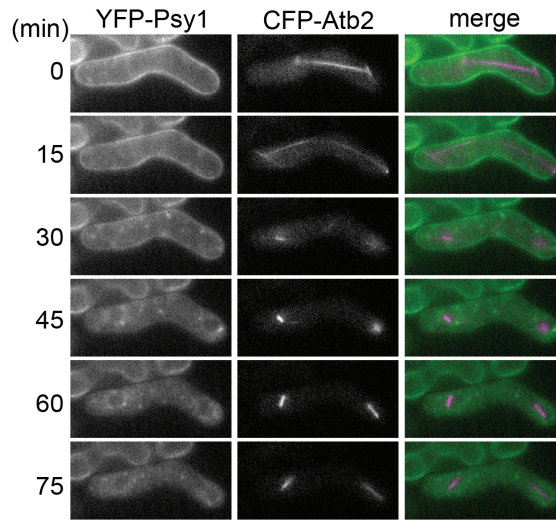

**B**

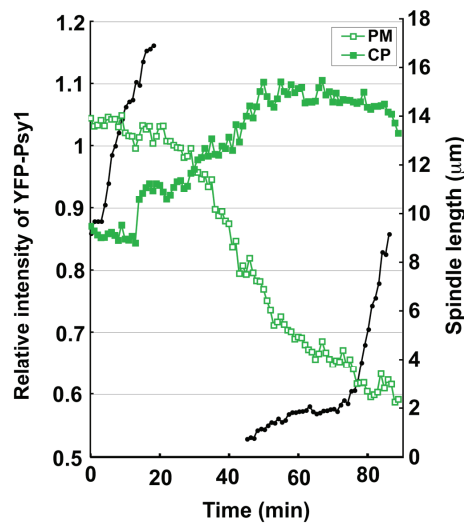

**Supplemental Figure S1.** Internalization of Psy1 is not affected by a defect in FSM formation. (A) A *spo15 $\Delta$  strain (TN353) expressing YFP-Psy1 and CFP-Atb2 was cultured on SSA containing 2  $\mu$ M thiamine at 28°C for 16 hr. Images were obtained every 1 minute, and those taken at 15-minute intervals are shown (See also*



Supplemental Movie 7). Two images, YFP-Psy1 and CFP-Atb2, have been merged using two pseudocolors, green and magenta, respectively. Bar, 10  $\mu\text{m}$ . (B) Kinetics of Psy1 internalization in *spo15 $\Delta$* . Measurements of the fluorescence intensity of YFP-Psy1, in addition to the length of spindle microtubules, were performed as described in Figure 1.

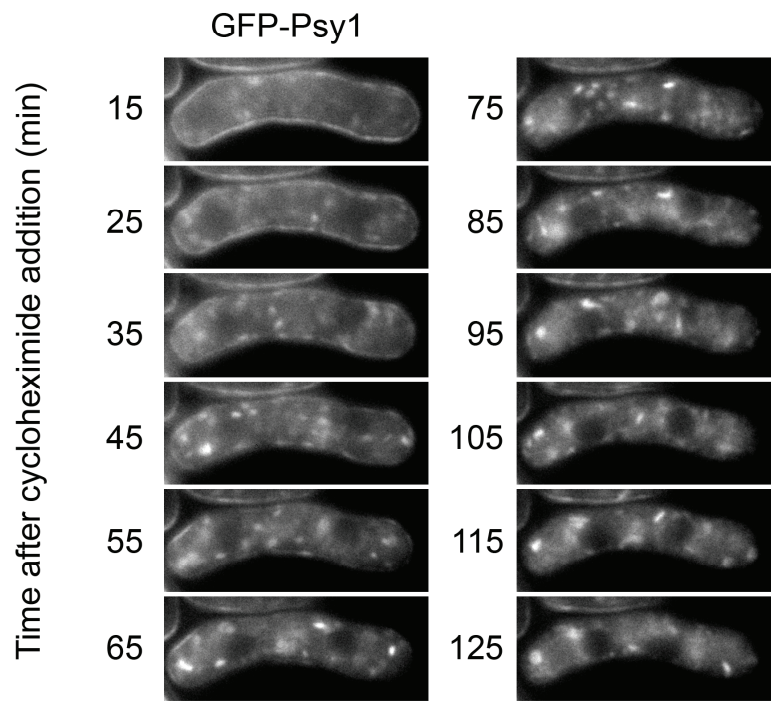

**Supplemental Figure S2.** Effect of cycloheximide on Psy1 internalization. A wild-type strain (YN68) expressing GFP-Psy1 was cultured on SSA at 28°C for 16 hr. Cells at meiosis I were suspended in SSL-N liquid medium containing 200  $\mu\text{g/ml}$  of cycloheximide for 15 min, after which images were obtained every 2 min. Images taken at 10-minute intervals are shown (See also Supplemental Movie 5). Bar, 10  $\mu\text{m}$ .

Supplemental Figure S3 Kashiwazaki et al (2011)

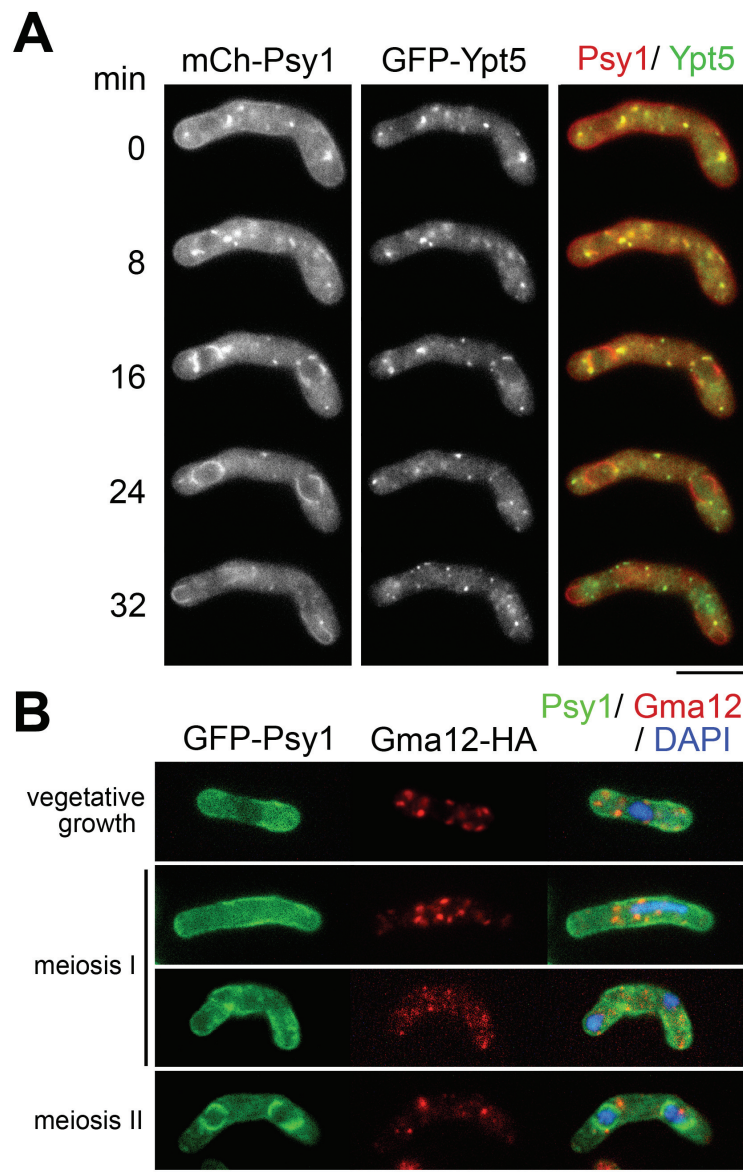

**Supplemental Figure S3.** After internalization, Psy1 is transported to the FSM via the endosome. (A) A wild-type strain (ZK151[pREP41-GFP-ypt5]) expressing mCherry-Psy1 and GFP-Ypt5 was cultured on SSA at 28°C for 16 hr. Images of a cell just after meiosis I were obtained every minute and those taken at 8-minute intervals are shown (See also Supplemental Movie 6). Two images, mCherry-Psy1 and GFP-Ypt5,

have been merged using two pseudocolors, red and green, respectively. (B) A wild-type strain (ZK225[pREP1-gma12-HA]) expressing GFP-Psy1 and Gma12-HA was incubated on MM-N containing 0.05  $\mu$ M thiamine at 28°C for 16 hr. Gma12-HA and the chromatin region were visualized as described in Supplementary Materials and Methods. Bars, 10  $\mu$ m.

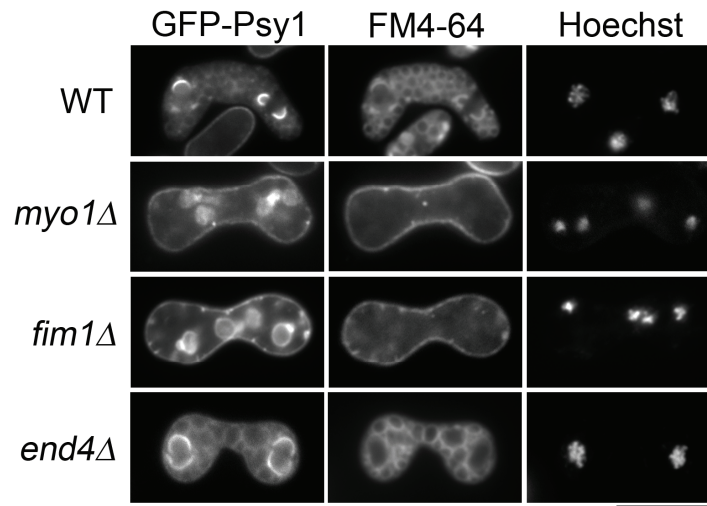

**Supplemental Figure S4.** Simultaneous observation of the behavior of GFP-Psy1 and the internalization of FM4-64.

Wild-type (YN68), *myo1Δ* (ZK194), *fim1Δ* (ZK186), and *end4Δ* (ZK69) strains expressing GFP-Psy1 were cultured on SSA at 28°C for 16 h. The chromatin region was stained with Hoechst 33342. Cells were then labeled with 8 μM FM4-64 for 5 min and observed immediately. Bar, 10 μm.

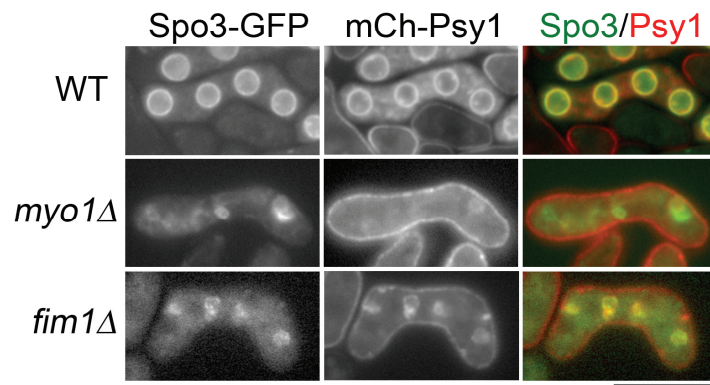

**Supplemental Figure S5.** Simultaneous observation of Spo3-GFP and mCherry-Psy1.

Wild-type (TN454), *myo1Δ* (TN458), and *fim1Δ* (TN455) strains expressing Spo3-GFP and mCherry-Psy1 were cultured on SSA at 25°C for 16 hr. Two images, Spo3-GFP and mCherry-Psy1, have been merged using two pseudocolors, green and red, respectively.

Bar, 10 μm.

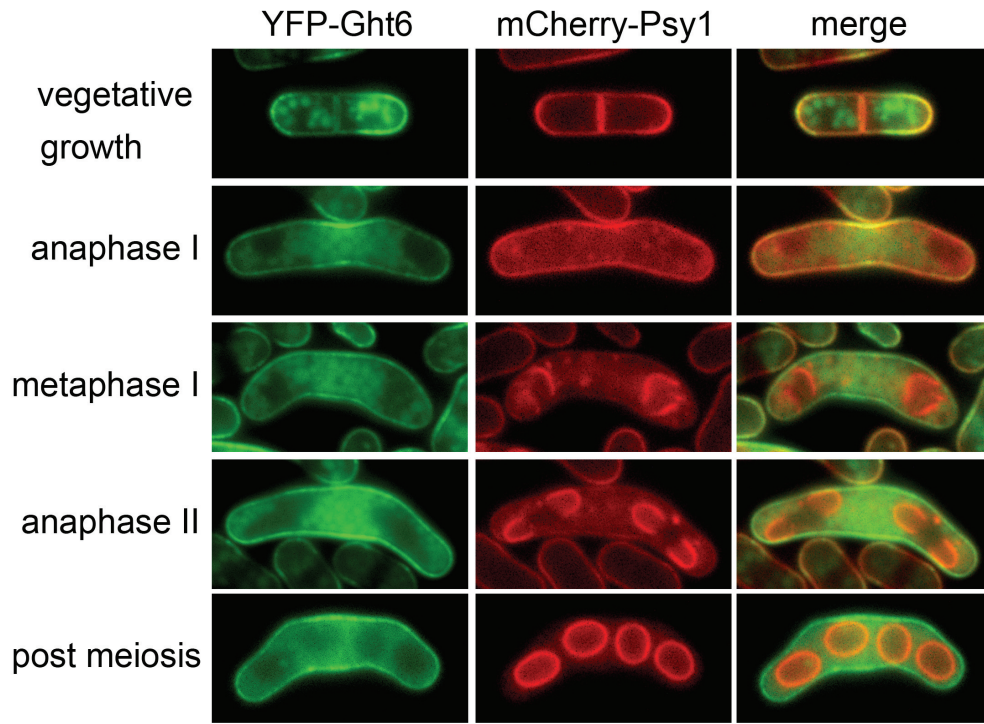

**Supplemental Figure S6.** Localization of Ght6 during meiosis. Wild-type strain (ZK230) expressing Ght6-YFP and mCherry-Psy1 was cultured on SSA at 25°C for 16 hr. The chromatin region was stained with Hoechst 33342. Bar, 10  $\mu$ m.

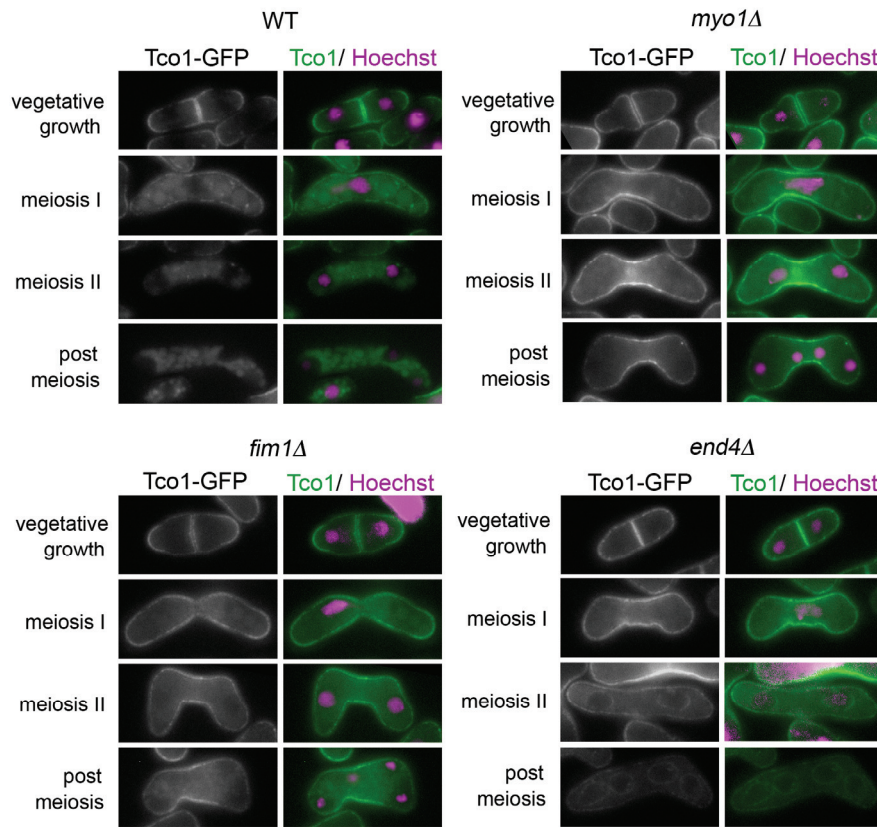

**Supplemental Figure S7.** Internalization of Tco1 during meiosis. Wild-type (ZK353), *myo1Δ* (ZK347), *fim1Δ* (ZK342), and *end4Δ* (ZK338) strains expressing Tco1-GFP were cultured on SSA at 25°C for 16 hr. The chromatin region was stained with Hoechst 33342. Bar, 10  $\mu$ m.



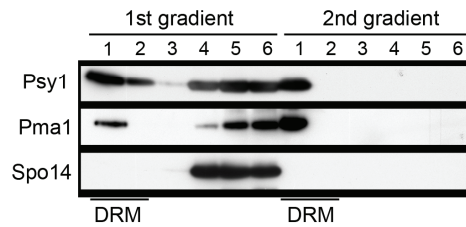

**Supplemental Figure S8.** Detergent solubility of GFP-Psy1 and Pma1-GFP in Optiprep gradients. Cells expressing Pma1-GFP (ZK216) were cultured in MM medium at 28°C. Solubilization of Pma1-GFP was tested in Optiprep gradients. Fractions 1–6 (top to bottom of the gradient) were analyzed by Western blotting using anti-Psy1, anti-GFP, or anti-Spo14 antibodies to detect Psy1, Pma1, or Spo14, respectively. DRM, detergent-resistant membrane.

## **Supplementary Movie Legends**

**Supplemental Movie 1.** Behavior of GFP-tagged Psy1 during sporulation in a wild-type cell. Wild-type strain YN68 was cultured on sporulation medium (SSA) at 28°C for 16 h, stained with Hoechst 33342, and then grown in SSL-N medium. Time-lapse images of living zygote cells were acquired. The FSM and microtubule are shown in green and magenta, respectively.

**Supplemental Movie 2.** Psy1 internalizes at the interphase after meiosis I. The movie corresponds to the frames shown in Figure 1A. In the merged movie, the FSM and nucleus are shown in green and magenta, respectively.

**Supplemental Movie 3.** Psy1 is internalized normally in *spo15Δ*. The movie corresponds to the frames shown in Supplemental Figure 1A.

**Supplemental Movie 4.** Behavior of Dendra2-Psy1. The movie corresponds to the frames shown in Figure 1C.

**Supplemental Movie 5.** Cycloheximide treatment does not affect the internalization of Psy1. The movie corresponds to the frames shown in Supplemental Figure 2.

**Supplemental Movie 6.** Psy1 is internalized by endocytosis. The movie corresponds to the frames shown in Figure 2B.

**Supplemental Movie 7.** Psy1 is transported to the FSM via the endosome. The movie corresponds to the frames shown in Supplemental Figure 3A.

**Supplemental Table 1.** Strains used in this study.

| Strain                  | Genotype                                                                                                   | Source/Reference               |
|-------------------------|------------------------------------------------------------------------------------------------------------|--------------------------------|
| 15/A08-YFH              | <i>h<sup>90</sup> leu1&lt;&lt;P<sub>nmt1</sub>-mug33-YFP-FLAG-His<sub>6</sub></i>                          | Matsuyama <i>et al.</i> , 2006 |
| 20/B06-YFH              | <i>h<sup>90</sup> leu1&lt;&lt;P<sub>nmt1</sub>-sec9-YFP-FLAG-His<sub>6</sub></i>                           | Matsuyama <i>et al.</i> , 2006 |
| 25/G09-YFH              | <i>h<sup>90</sup> leu1&lt;&lt;P<sub>nmt1</sub>-ght6-YFP-FLAG-His<sub>6</sub></i>                           | Matsuyama <i>et al.</i> , 2006 |
| 45/C01-YFH              | <i>h<sup>90</sup> leu1&lt;&lt;P<sub>nmt1</sub>-bsu1-YFP-FLAG-His<sub>6</sub></i>                           | Matsuyama <i>et al.</i> , 2006 |
| 47/H02-YFH              | <i>h<sup>90</sup> leu1&lt;&lt;P<sub>nmt1</sub>-cta3-YFP-FLAG-His<sub>6</sub></i>                           | Matsuyama <i>et al.</i> , 2006 |
| 50/G04-YFH              | <i>h<sup>90</sup> leu1&lt;&lt;P<sub>nmt1</sub>-sod2-YFP-FLAG-His<sub>6</sub></i>                           | Matsuyama <i>et al.</i> , 2006 |
| AI227 (FY21404)*        | <i>h<sup>90</sup> myo1::kan<sup>r</sup> leu1-32</i>                                                        | This study                     |
| CP18-8 (FY13842)*       | <i>h<sup>+</sup> cps8-188</i>                                                                              | Ishiguro and Kobayashi, 1996   |
| <i>end4D</i> (FY12693)* | <i>h<sup>90</sup> end4::ura4<sup>+</sup> ura4-D18 leu1-32</i>                                              | Iwaki <i>et al.</i> , 2004     |
| <i>erg2D</i>            | <i>h<sup>90</sup> erg2::ura4<sup>+</sup> ura4-D18 leu1-32</i>                                              | Iwaki <i>et al.</i> , 2008     |
| ET21 (FY21405)*         | <i>h<sup>90</sup> mei4::ura4<sup>+</sup> pmd1::GFP kanr ura4-D18</i>                                       | This study                     |
| ET22 (FY21406)*         | <i>h<sup>90</sup> mei4::ura4<sup>+</sup> tco1::GFP kanr ura4-D18</i>                                       | This study                     |
| H05/C05 (FY15503)*      | <i>h<sup>90</sup> ght6::GFP kanr ade6-M216 ura4-D18 leu1-32 lys1</i>                                       | Hayashi <i>et al.</i> , 2009   |
| H06/C07 (FY15465)*      | <i>h<sup>90</sup> phz1::GFP kanr ade6-M216 ura4-D18 leu1-32 lys1</i>                                       | Hayashi <i>et al.</i> , 2009   |
| H09/H11 (FY14815)*      | <i>h<sup>90</sup> SPBC1652.02::GFP kanr ade6-M216 ura4-D18 leu1-32 lys1</i>                                | Hayashi <i>et al.</i> , 2009   |
| H10/A12 (FY14959)*      | <i>h<sup>90</sup> ctr5::GFP kanr ade6-M216 ura4-D18 leu1-32 lys1</i>                                       | Hayashi <i>et al.</i> , 2009   |
| H10/C09 (FY15020)*      | <i>h<sup>90</sup> cki3::GFP kanr ade6-M216 ura4-D18 leu1-32 lys1</i>                                       | Hayashi <i>et al.</i> , 2009   |
| H10/H11 (FY14958)*      | <i>h<sup>90</sup> tco1::GFP kanr ade6-M216 ura4-D18 leu1-32 lys1</i>                                       | Hayashi <i>et al.</i> , 2009   |
| H12/H07 (FY14997)*      | <i>h<sup>90</sup> cki1::GFP kanr ade6-M216 ura4-D18 leu1-32 lys1</i>                                       | Hayashi <i>et al.</i> , 2009   |
| H16/D05 (FY15336)*      | <i>h<sup>90</sup> SPAC32A11.02c::GFP kanr ade6-M216 ura4-D18 leu1-32 lys1</i>                              | Hayashi <i>et al.</i> , 2009   |
| H17/C01 (FY15399)*      | <i>h<sup>90</sup> SPBC36.03c::GFP kanr ade6-M216 ura4-D18 leu1-32 lys1</i>                                 | Hayashi <i>et al.</i> , 2009   |
| H17/C06 (FY15413)*      | <i>h<sup>90</sup> syp1::GFP kanr ade6-M216 ura4-D18 leu1-32 lys1</i>                                       | Hayashi <i>et al.</i> , 2009   |
| H17/F05 (FY15410)*      | <i>h<sup>90</sup> css1::GFP kanr ade6-M216 ura4-D18 leu1-32 lys1</i>                                       | Hayashi <i>et al.</i> , 2009   |
| H17/G11 (FY15429)*      | <i>h<sup>90</sup> pmd1::GFP kanr ade6-M216 ura4-D18 leu1-32 lys1</i>                                       | Hayashi <i>et al.</i> , 2009   |
| JW393 (FY12684)*        | <i>h<sup>90</sup> myo1::kan<sup>r</sup> ade6-M216 leu1-32</i>                                              | Toya <i>et al.</i> , 2001      |
| JW635 (FY12686)*        | <i>h<sup>90</sup> myo1-GFP::kan<sup>r</sup> leu1-32</i>                                                    | M Yamamoto                     |
| KFM101 (FY17228)*       | <i>h<sup>+</sup> fim1::ura4<sup>+</sup> ade6-M216 ura4-D18 leu1-32</i>                                     | Nakano and Mabuchi, 2006       |
| TN8 (FY7132)*           | <i>h<sup>90</sup> leu1-32</i>                                                                              | Nakamura <i>et al.</i> , 2001  |
| TN29 (FY7085)*          | <i>h<sup>90</sup> ura4-D18 leu1-32</i>                                                                     | Nakase <i>et al.</i> , 2001    |
| TN344 (FY13227)*        | <i>h<sup>90</sup> ade6&lt;&lt;YFP-psy1 leu1-32 [pREP1-CFP-atb2]</i>                                        | Nakamura <i>et al.</i> , 2008  |
| TN353 (FY13234)*        | <i>h<sup>90</sup> spo15::ura4<sup>+</sup> ura4-D18 ade6&lt;&lt;YFP-psy1 leu1-32 [pREP1-CFP-atb2]</i>       | Nakamura <i>et al.</i> , 2008  |
| TN454 (FY21358)*        | <i>h<sup>90</sup> ade6&lt;&lt;mCherry-psy1 spo3-GFP&lt;&lt;LEU2</i>                                        | This study                     |
| TN455 (FY21359)*        | <i>h<sup>90</sup> fim1Δ::ura4<sup>+</sup> ade6&lt;&lt;mCherry-psy1 spo3-GFP&lt;&lt;LEU2</i>                | This study                     |
| TN458 (FY21360)*        | <i>h<sup>90</sup> myo1Δ::kan<sup>r</sup> ade6&lt;&lt;mCherry-psy1 leu1&lt;&lt;spo3-GFP</i>                 | This study                     |
| YN68 (FY12296)*         | <i>h<sup>90</sup> leu1&lt;&lt;GFP-psy1</i>                                                                 | Nakase <i>et al.</i> , 2004    |
| YW917 (FY7513)*         | <i>h<sup>90</sup> mei4::ura4<sup>+</sup> ade6-M216 ura4-D18 leu1-32</i>                                    | Horie <i>et al.</i> , 1998     |
| ZK69 (FY21361)*         | <i>h<sup>90</sup> end4::ura4<sup>+</sup> ura4-D18 leu1&lt;&lt;GFP-psy1</i>                                 | This study                     |
| ZK118 (FY21362)*        | <i>h<sup>90</sup> cps8-188 leu1&lt;&lt;GFP-psy1</i>                                                        | This study                     |
| ZK121 (FY21363)*        | <i>h<sup>90</sup> ura4-D18 leu1&lt;&lt;GFP-psy1</i>                                                        | This study                     |
| ZK146 (FY21364)*        | <i>h<sup>90</sup> myo1-GFP::kan<sup>r</sup> leu1&lt;&lt;mCherry-psy1</i>                                   | This study                     |
| ZK151 (FY21365)*        | <i>h<sup>90</sup> ade6&lt;&lt;mCherry-psy1 leu1-32</i>                                                     | This study                     |
| ZK184 (FY21366)*        | <i>h<sup>90</sup> fim1::ura4<sup>+</sup> ade6-M216 ura4-D18 leu1&lt;&lt;GFP-psy1</i>                       | This study                     |
| ZK185 (FY21367)*        | <i>h<sup>90</sup> fim1::ura4<sup>+</sup> ura4-D18 leu1-32</i>                                              | This study                     |
| ZK186 (FY21368)*        | <i>h<sup>90</sup> fim1::ura4<sup>+</sup> ura4-D18 leu1&lt;&lt;GFP-psy1</i>                                 | This study                     |
| ZK194 (FY21369)*        | <i>h<sup>90</sup> myo1::kan<sup>r</sup> leu1&lt;&lt;GFP-psy1</i>                                           | This study                     |
| ZK196 (FY21370)*        | <i>h<sup>90</sup> myo1::kan<sup>r</sup> ade6-M216 leu1&lt;&lt;GFP-psy1</i>                                 | This study                     |
| ZK207 (FY21371)*        | <i>h<sup>90</sup> end4::ura4<sup>+</sup> ade6-M216 ura4-D18 leu1&lt;&lt;GFP-psy1</i>                       | This study                     |
| ZK216 (FY21372)*        | <i>h<sup>90</sup> leu1&lt;&lt;pma1-GFP</i>                                                                 | This study                     |
| ZK217 (FY21373)*        | <i>h<sup>90</sup> ade6&lt;&lt;mCherry-psy1 leu1&lt;&lt;pma1-GFP</i>                                        | This study                     |
| ZK225 (FY21374)*        | <i>h<sup>90</sup> ade6&lt;&lt;GFP-psy1 leu1-32</i>                                                         | This study                     |
| ZK228 (FY21375)*        | <i>h<sup>90</sup> ade6&lt;&lt;mCherry-psy1 leu1&lt;&lt;P<sub>nmt1</sub>-mug33-YFP-FLAG-His<sub>6</sub></i> | This study                     |

|                  |                                                                                                           |            |
|------------------|-----------------------------------------------------------------------------------------------------------|------------|
| ZK230 (FY21376)* | <i>h<sup>90</sup> ade6&lt;&lt;mCherry-psy1 leu1&lt;&lt;P<sub>nmr1</sub>-ght6-YFP-FLAG-His<sub>6</sub></i> | This study |
| ZK232 (FY21377)* | <i>h<sup>90</sup> ade6&lt;&lt;mCherry-psy1 leu1&lt;&lt;P<sub>nmr1</sub>-bsu1-YFP-FLAG-His<sub>6</sub></i> | This study |
| ZK233 (FY21378)* | <i>h<sup>90</sup> ade6&lt;&lt;mCherry-psy1 leu1&lt;&lt;P<sub>nmr1</sub>-cta3-YFP-FLAG-His<sub>6</sub></i> | This study |
| ZK234 (FY21379)* | <i>h<sup>90</sup> ade6&lt;&lt;mCherry-psy1 leu1&lt;&lt;P<sub>nmr1</sub>-sod2-YFP-FLAG-His<sub>6</sub></i> | This study |
| ZK237 (FY21380)* | <i>h<sup>90</sup> erg2::ura4<sup>+</sup> ura4-D18 leu1&lt;&lt;GFP-psy1</i>                                | This study |
| ZK247 (FY21381)* | <i>h<sup>90</sup> leu1&lt;&lt;Dendra2-psy1</i>                                                            | This study |
| ZK256 (FY21382)* | <i>h<sup>90</sup> mei4::ura4<sup>+</sup> ade6&lt;&lt;GFP-psy1 ura4-D18 leu1-32</i>                        | This study |
| ZK264 (FY21383)* | <i>h<sup>90</sup> myo1::kanr ade6&lt;&lt;GFP-psy1 leu1-32</i>                                             | This study |
| ZK270 (FY21384)* | <i>h<sup>90</sup> fim1::ura4<sup>+</sup> ade6&lt;&lt;GFP-psy1 ura4-D18 leu1-32</i>                        | This study |
| ZK276 (FY21385)* | <i>h<sup>90</sup> end4::ura4<sup>+</sup> ade6&lt;&lt;GFP-psy1 ura4-D18 leu1-32</i>                        | This study |
| ZK338 (FY21386)* | <i>h<sup>90</sup> end4::ura4<sup>+</sup> tco1::GFP kanr ura4-D18</i>                                      | This study |
| ZK339 (FY21387)* | <i>h<sup>90</sup> end4::ura4<sup>+</sup> pmd1::GFP kanr ura4-D18</i>                                      | This study |
| ZK342 (FY21388)* | <i>h<sup>90</sup> fim1::ura4<sup>+</sup> tco1::GFP kanr ura4-D18</i>                                      | This study |
| ZK343 (FY21389)* | <i>h<sup>90</sup> fim1::ura4<sup>+</sup> pmd1::GFP kanr ura4-D18</i>                                      | This study |
| ZK347 (FY21390)* | <i>h<sup>90</sup> myo1::kanr tco1::GFP kanr</i>                                                           | This study |
| ZK348 (FY21391)* | <i>h<sup>90</sup> myo1::kanr pmd1::GFP kanr</i>                                                           | This study |
| ZK352 (FY21392)* | <i>h<sup>90</sup> SPBC1652.02::GFP kanr</i>                                                               | This study |
| ZK353 (FY21393)* | <i>h<sup>90</sup> tco1::GFP kanr</i>                                                                      | This study |
| ZK354 (FY21394)* | <i>h<sup>90</sup> pmd1::GFP kanr</i>                                                                      | This study |
| ZK371 (FY21395)* | <i>h<sup>90</sup> ade6&lt;&lt;mCherry-psy1 leu1-32 [pAI1]</i>                                             | This study |
| ZK372 (FY21396)* | <i>h<sup>90</sup> ade6&lt;&lt;mCherry-psy1 leu1-32 [S644]</i>                                             | This study |
| ZK373 (FY21401)* | <i>h<sup>90</sup> ade6&lt;&lt;mCherry-psy1 leu1-32 [TN46]</i>                                             | This study |
| ZK374 (FY21402)* | <i>h<sup>90</sup> ade6&lt;&lt;mCherry-psy1 leu1-32 [TC45]</i>                                             | This study |
| ZK375 (FY21403)* | <i>h<sup>90</sup> ade6&lt;&lt;mCherry-psy1 leu1-32 [pZK183]</i>                                           | This study |

\*YGRC, Yeast Genetic Resource Center Japan (<http://yeast.lab.nig.ac.jp/nig/>). The strains constructed in this study will be deposited in the YGRC.

**Supplemental Table 2.** Plasmids used in this study

| Name              | Description                                                     | Selection Markers                     | Reference                          |
|-------------------|-----------------------------------------------------------------|---------------------------------------|------------------------------------|
| pAI1              | pAL-8C9.04c-GFP                                                 | <i>amp</i> ; <i>LEU2</i>              | A Itadani                          |
| pAL-KS (FYP788)*  | <i>ars1</i>                                                     | <i>amp</i> ; <i>LEU2</i>              | Tanaka <i>et al.</i> , 2000        |
| pREP1-gma12-HA    | pREP1-gma12-HA                                                  | <i>amp</i> ; <i>LEU2</i>              | T Yoko-o                           |
| pREP41            | <i>ars1</i> , <i>nmt41</i> promoter                             | <i>amp</i> ; <i>LEU2</i>              | Maundrell, 1993                    |
| S644 (FYP1836)*   | pEG3- <i>pck1</i> (1- aa)-GFP                                   | <i>amp</i> ; <i>LEU2</i>              | Ding <i>et al.</i> , 2000          |
| TN46 (FYP1891)*   | pEG3- <i>wsc1</i> (1-280 aa)-GFP                                | <i>amp</i> ; <i>LEU2</i>              | Ding <i>et al.</i> , 2000          |
| TC45 (FYP1991)*   | pEG3- <i>23B6</i> (1- aa)-GFP                                   | <i>amp</i> ; <i>LEU2</i>              | Ding <i>et al.</i> , 2000          |
| pTN54             | pREP41-GFP                                                      | <i>amp</i> ; <i>LEU2</i>              | Nakamura <i>et al.</i> , 2001      |
| pTN143 (FYP410)*  | pAL-KS-GFP- <i>nmt1</i> terminator                              | <i>amp</i> ; <i>LEU2</i>              | Ikemoto <i>et al.</i> , 2000       |
| pTN363 (FYP872)*  | pBR322- <i>leu1</i> - <i>P<sub>psy1</sub></i> -GFP- <i>psy1</i> | <i>amp</i> ; <i>leu1</i> <sup>+</sup> | Nakamura-Kubo <i>et al.</i> , 2003 |
| pTN381 (FYP890)*  | pBR322- <i>leu1</i>                                             | <i>amp</i> ; <i>leu1</i> <sup>+</sup> | Kashiwazaki <i>et al.</i> , 2005   |
| pTN459 (FYP969)*  | pREP1-CFP- <i>atb2</i>                                          | <i>amp</i> ; <i>LEU2</i>              | Nakamura <i>et al.</i> , 2008      |
| pTN505 (FYP1014)* | pIA-YFP- <i>psy1</i>                                            | <i>amp</i> ; <i>ade6</i> <sup>+</sup> | Nakamura <i>et al.</i> , 2008      |
| pYN113 (FYP135)*  | pREP41( <i>ade6</i> )- <i>mei4</i>                              | <i>amp</i> ; <i>ade6</i> <sup>+</sup> | Y Nakese                           |
| pZK182            | pIA-mCherry- <i>psy1</i>                                        | <i>amp</i> ; <i>ade6</i> <sup>+</sup> | This study                         |
| pZK183            | pREP41-GFP- <i>sec1</i>                                         | <i>amp</i> ; <i>LEU2</i>              | This study                         |
| pZK188            | pAL- <i>pma1</i> -GFP                                           | <i>amp</i> ; <i>LEU2</i>              | This study                         |
| pZK194            | pREP41-GFP- <i>ypt5</i>                                         | <i>amp</i> ; <i>LEU2</i>              | This study                         |
| pZK200            | pTN381- <i>pma1</i> -GFP                                        | <i>amp</i> ; <i>leu1</i> <sup>+</sup> | This study                         |
| pZK205            | pREP2-GFP- <i>ypt5</i>                                          | <i>amp</i> ; <i>ura4</i> <sup>+</sup> | This study                         |
| pZK206            | pBS-Dendra2                                                     | <i>amp</i>                            | This study                         |
| pZK207            | pBS-Dendra2- <i>psy1</i>                                        | <i>amp</i>                            | This study                         |
| pZK208            | pBS- <i>P<sub>psy1</sub></i> -Dendra2- <i>psy1</i>              | <i>amp</i>                            | This study                         |
| pZK209            | pTN381- <i>P<sub>psy1</sub></i> -Dendra2- <i>psy1</i>           | <i>amp</i> ; <i>leu1</i> <sup>+</sup> | This study                         |

\*YGRC, Yeast Genetic Resource Center Japan (<http://yeast.lab.nig.ac.jp/nig/>). The Plasmids constructed in this study will be deposited in the YGRC.

## Supplementary References

- Bagnat, M., Keränen, S., Shevchenko, A., and Simons, K. (2000). Lipid rafts function in biosynthetic delivery of proteins to the cell surface in yeast. *Proc Natl Acad Sci U S A* *97*, 3254-3259.
- Ding, D.Q., Tomita, Y., Yamamoto, A., Chikashige, Y., Haraguchi, T., and Hiraoka, Y. (2000). Large-scale screening of intracellular protein localization in living fission yeast cells by the use of a GFP-fusion genomic DNA library. *Genes Cells* *5*, 169-190.
- Hagan, I.M., and Hyams, J.S. (1988). The Use of Cell-Division Cycle Mutants to Investigate the Control of Microtubule Distribution in the Fission Yeast *Schizosaccharomyces pombe*. *J Cell Sci* *89*, 343-357.
- Hayashi, A., Ding, D., Da-Qiao, D., Tsutsumi, C., Chikashige, Y., Masuda, H., Haraguchi, T., and Hiraoka, Y. (2009). Localization of gene products using a chromosomally tagged GFP-fusion library in the fission yeast *Schizosaccharomyces pombe*. *Genes Cells* *14*, 217-225.
- Horie, S., Watanabe, Y., Tanaka, K., Nishiwaki, S., Fujioka, H., Abe, H., Yamamoto, M., and Shimoda, C. (1998). The *Schizosaccharomyces pombe mei4<sup>+</sup>* gene encodes a meiosis-specific transcription factor containing a forkhead DNA-binding domain. *Mol Cell Biol* *18*, 2118-2129.
- Ikemoto, S., Nakamura, T., Kubo, M., and Shimoda, C. (2000). *S. pombe* sporulation-specific coiled-coil protein Spo15p is localized to the spindle pole body and essential for its modification. *J Cell Sci* *113 (Pt 3)*, 545-554.
- Ishiguro, J., and Kobayashi, W. (1996). An actin point-mutation neighboring the 'hydrophobic plug' causes defects in the maintenance of cell polarity and septum organization in the fission yeast *Schizosaccharomyces pombe*. *FEBS Lett* *392*, 237-241.
- Iwaki, T., Iefuji, H., Hiraga, Y., Hosomi, A., Morita, T., Giga-Hama, Y., and Takegawa, K. (2008). Multiple functions of ergosterol in the fission yeast *Schizosaccharomyces pombe*. *Microbiology* *154*, 830-841.
- Iwaki, T., Tanaka, N., Takagi, H., Giga-Hama, Y., and Takegawa, K. (2004). Characterization of *end4<sup>+</sup>*, a gene required for endocytosis in *Schizosaccharomyces pombe*. *Yeast* *21*, 867-881.
- Kashiwazaki, J., Nakamura, T., Iwaki, T., Takegawa, K., and Shimoda, C. (2005). A role for fission yeast Rab GTPase Ypt7p in sporulation. *Cell Struct Funct* *30*, 43-49.
- Maeda, Y., Kashiwazaki, J., Shimoda, C., and Nakamura, T. (2009). The *Schizosaccharomyces pombe* syntaxin 1 homolog, Psy1, is essential in the development of the forespore membrane. *Biosci Biotechnol Biochem* *73*, 339-345.
- Matsuyama, A., Arai, R., Yashiroda, Y., Shirai, A., Kamata, A., Sekido, S., Kobayashi, Y., Hashimoto, A., Hamamoto, M., Hiraoka, Y., Horinouchi, S., and Yoshida, M. (2006). ORFeome cloning and global analysis of protein localization in the fission yeast *Schizosaccharomyces pombe*. *Nat Biotechnol* *24*, 841-847.
- Maundrell, K. (1993). Thiamine-repressible expression vectors pREP and pRIP for fission yeast. *Gene* *123*, 127-130.
- Nakamura, T., Asakawa, H., Nakase, Y., Kashiwazaki, J., Hiraoka, Y., and Shimoda, C. (2008). Live observation of forespore membrane formation in fission yeast. *Mol Biol Cell* *19*, 3544-3553.
- Nakamura, T., Nakamura-Kubo, M., Hirata, A., and Shimoda, C. (2001). The *Schizosaccharomyces pombe spo3<sup>+</sup>* gene is required for assembly of the forespore membrane and genetically interacts with *psyl<sup>+</sup>*-encoding syntaxin-like protein. *Mol Biol Cell* *12*, 3955-3972.

Nakamura-Kubo, M., Nakamura, T., Hirata, A., and Shimoda, C. (2003). The fission yeast *spo14<sup>+</sup>* gene encoding a functional homologue of budding yeast Sec12 is required for the development of forespore membranes. *Mol Biol Cell* *14*, 1109-1124.

Nakano, K., and Mabuchi, I. (2006). Actin-depolymerizing protein Adf1 is required for formation and maintenance of the contractile ring during cytokinesis in fission yeast. *Mol Biol Cell* *17*, 1933-1945.

Nakase, Y., Nakamura, T., Hirata, A., Routt, S., Skinner, H., Bankaitis, V., and Shimoda, C. (2001). The *Schizosaccharomyces pombe spo20(+)* gene encoding a homologue of *Saccharomyces cerevisiae* Sec14 plays an important role in forespore membrane formation. *Mol Biol Cell* *12*, 901-917.

Nakase, Y., Nakamura, T., Okazaki, K., Hirata, A., and Shimoda, C. (2004). The Sec14 family glycerophospholipid-transfer protein is required for structural integrity of the spindle pole body during meiosis in fission yeast. *Genes Cells* *9*, 1275-1286.

Tanaka, K., Yonekawa, T., Kawasaki, Y., Kai, M., Furuya, K., Iwasaki, M., Murakami, H., Yanagida, M., and Okayama, H. (2000). Fission yeast Eso1p is required for establishing sister chromatid cohesion during S phase. *Mol Cell Biol* *20*, 3459-3469.

Toya, M., Motegi, F., Nakano, K., Mabuchi, I., and Yamamoto, M. (2001). Identification and functional analysis of the gene for type I myosin in fission yeast. *Genes Cells* *6*, 187-199.
